# Supplementary material for: The main anthocyanin monomer of Lycium ruthenicum Murray induces apoptosis through the ROS/PTEN/PI3K/Akt/caspase 3 signaling pathway in prostate cancer DU-145 cells
Source: Royal Society of Chemistry journal article supplement (doi:10.1039/d0fo02382e), 2021-01-01
Supplement: d0fo02382e1.pdf [file d0fo02382e1.pdf]

A

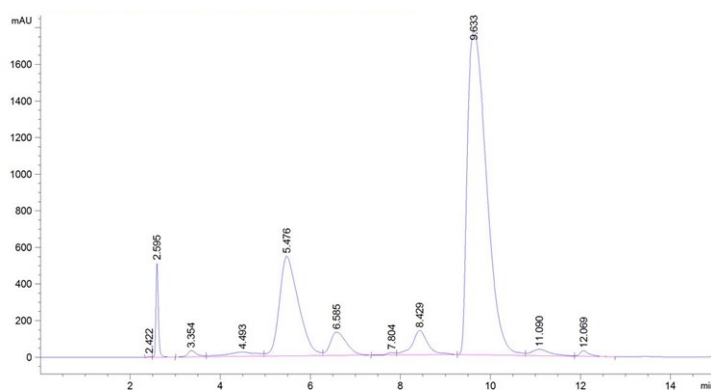

B

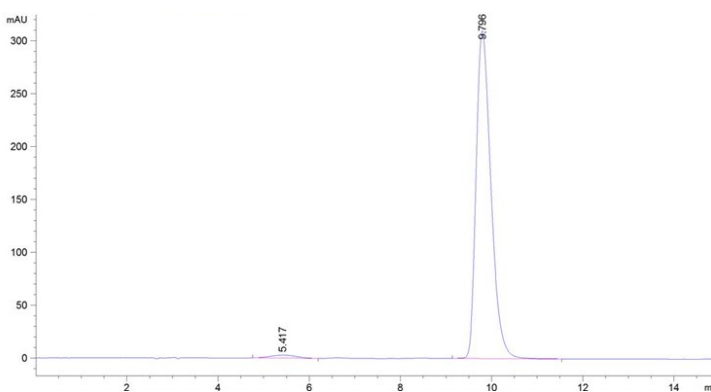

C

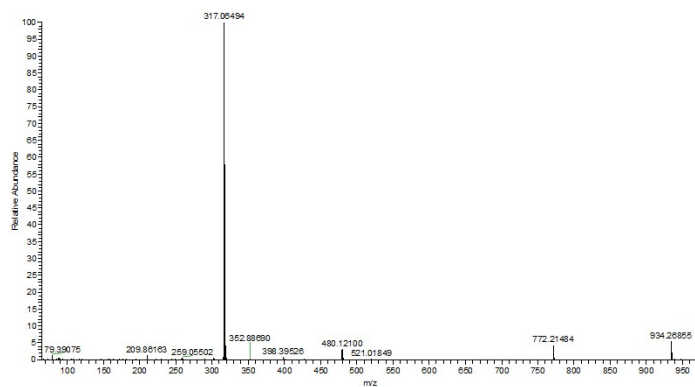

**Supplementary Figure 1 The HPLC and MALDI-TOF-MS of anthocyanins from *Lycium ruthenicum* Murray. (A) HPLC of the crude extract of anthocyanins. (B) HPLC of the Pt3G. (C) MALDI-TOF-MS of Pt3G.**
